# Supplementary material for: Reduced levels of N’-methyl-2-pyridone-5-carboxamide and lysophosphatidylcholine 16:0 in the serum of patients with intrahepatic cholangiocarcinoma, and the correlation with recurrence-free survival
Source: PubMed Central journal article supplement (PMC5762534; doi:10.18632/oncotarget.22607), 2017-11-22
Supplement: oncotarget-08-112598-s001.pdf [file oncotarget-08-112598-s001.pdf]

## Reduced levels of N'-methyl-2-pyridone-5-carboxamide and lysophosphatidylcholine 16:0 in the serum of patients with intrahepatic cholangiocarcinoma, and the correlation with recurrence-free survival

### SUPPLEMENTARY MATERIALS

**Supplementary Table 1: No values of the candidate metabolites were significantly associated with T or N stage. See\_Supplementary\_Table 1**

**Supplementary Table 2: 2PY and LPC16 level was associated with RFS**

|                     |      | Total<br>(N = 87) | RFS (event)    |                 | p-value |
|---------------------|------|-------------------|----------------|-----------------|---------|
|                     |      |                   | No<br>(N = 23) | Yes<br>(N = 64) |         |
| L-Glutamine (ng/ul) | Low  | 30                | 5 (16.67)      | 25 (83.33)      | 0.1494  |
|                     | High | 57                | 18 (31.58)     | 39 (68.42)      |         |
| 2PY (pg/ul)         | Low  | 57                | 20 (35.09)     | 37 (64.91)      | 0.0366  |
|                     | High | 30                | 3 (10.00)      | 27 (90.00)      |         |
| FPA (pg/ul)         | Low  | 68                | 18 (26.47)     | 50 (73.53)      | 0.4868  |
|                     | High | 19                | 5 (26.32)      | 14 (73.68)      |         |
| Uric acid (ng/ul)   | Low  | 57                | 11 (19.30)     | 46 (80.70)      | 0.0663  |
|                     | High | 30                | 12 (40.00)     | 18 (60.00)      |         |
| LPC16:0 (AU)        | Low  | 36                | 14 (38.89)     | 22 (61.11)      | 0.035   |
|                     | High | 51                | 9 (17.65)      | 42 (82.35)      |         |
| LPC18:0 (AU)        | Low  | 80                | 19 (23.75)     | 61 (76.25)      | 0.1116  |
|                     | High | 7                 | 4 (57.14)      | 3 (42.86)       |         |

Recurrence-free survival, RFS; arbitrary unit, AU.
